# Supplementary material
Source: HighWire-hosted journal article supplement (https://bmjopen.bmj.com/content/11/2/e044045)
Supplement: inline-supplementary-material-1 [file inline-supplementary-material-1.pdf]

## BMJ Open Supplementary Material 1

## SPIRIT Item2b: WHO Trial Registration Data Set

| Data Category                                 | Information                                                                                                                                          |
|-----------------------------------------------|------------------------------------------------------------------------------------------------------------------------------------------------------|
| Primary registry and trial identifying number | Australian New Zealand Clinical Trial Registry<br><a href="https://www.anzctr.org.au">https://www.anzctr.org.au</a><br>Trial ID: ACTRN12620001080910 |
| Date of registration in primary registry      | 20 October 2020                                                                                                                                      |
| Secondary identifying numbers                 | 2019/552                                                                                                                                             |
| Source(s) of monetary or material support     | School of Psychology, The University of Sydney                                                                                                       |
| Primary sponsor                               | The University of Sydney                                                                                                                             |
| Secondary sponsor(s)                          | N/A                                                                                                                                                  |
| Contact for public queries                    | A/Prof Ben Colagiuri PhD, +61 2 9351 4589,<br>ben.colagiuri@sydney.edu.au                                                                            |
| Contact for scientific queries                | A/Prof Ben Colagiuri PhD, +61 2 9351 4589,<br>ben.colagiuri@sydney.edu.au                                                                            |
| Public Title                                  | Open-label placebo for insomnia (OPIN)                                                                                                               |
| Scientific Title                              | Open-label placebo for insomnia (OPIN): a cohort multiple randomised controlled trial in adults with moderate or severe insomnia                     |
| Countries of recruitment                      | Australia                                                                                                                                            |

|                                           |                                                                                                                                                                                                                                                                                                                                                                                                                                                                                  |
|-------------------------------------------|----------------------------------------------------------------------------------------------------------------------------------------------------------------------------------------------------------------------------------------------------------------------------------------------------------------------------------------------------------------------------------------------------------------------------------------------------------------------------------|
| Health condition(s) or problem(s) studied | Insomnia                                                                                                                                                                                                                                                                                                                                                                                                                                                                         |
| Intervention(s)                           | Active comparator: open-label placebo (OLP) capsules<br>Placebo comparator: conventional (deceptive) placebo (CP) capsules                                                                                                                                                                                                                                                                                                                                                       |
| Key inclusion and exclusion criteria      | Inclusion criteria: adult ( $\geq 18$ years), self-reported insomnia symptoms with score on Insomnia Severity Index (ISI) $\geq 10$<br>Exclusion criteria: sleep disorder other an insomnia, severe medical or psychiatric comorbidity, current regular ( $\geq 1$ /week) administration of sleep medication, current psychological treatment for sleep, currently pregnant, planning to conceive within 3 months, breastfeeding or 1-year post-partum, regular night shift work |
| Study type                                | Cohort multiple randomised controlled trial<br>Allocation: randomised<br>Intervention model: parallel assignment<br>Masking: Open-label placebo arm (both participant and investigator are aware of treatment allocation, conventional placebo arm (participant is blind but investigator aware of treatment allocation)<br>Primary purpose: Intervention outcome                                                                                                                |
| Date of first enrolment                   |                                                                                                                                                                                                                                                                                                                                                                                                                                                                                  |
| Target sample size                        | 267                                                                                                                                                                                                                                                                                                                                                                                                                                                                              |
| Recruitment status                        | Not yet recruiting                                                                                                                                                                                                                                                                                                                                                                                                                                                               |

|                        |                                                                                                                                                                                                                                                                                                                                                       |
|------------------------|-------------------------------------------------------------------------------------------------------------------------------------------------------------------------------------------------------------------------------------------------------------------------------------------------------------------------------------------------------|
| Primary outcome(s)     | Determine whether OLP is associated with reductions in self-reported insomnia symptoms measured with the Insomnia Severity Index (ISI), compared to CP and no treatment.                                                                                                                                                                              |
| Key secondary outcomes | Improvements in objective and subjective sleep parameters, daytime fatigue, anxiety, depression and stress, expectancy, treatment satisfaction and self-reported side effects; clinically significant improvements in insomnia in OLP, relative to CP and no treatment; rate of uptake of OLP relative to CP; predictors of uptake and placebo effect |
